# Supplementary material for: Tree community composition, structure and diversity along an elevational gradient in an Andean forest of Northern Ecuador
Source: Springer Nature journal article supplement (doi:10.1007/s11629-020-6479-3), 2021-09-01
Supplement: 11629_2020_6479_MOESM1_ESM.pdf [file 11629_2020_6479_MOESM1_ESM.pdf]

The following Appendix (Appendixes 1-4) is the Electronic Supplementary Material of the article entitled “Tree community composition, structure and diversity along an elevational gradient in an Andean forest of Northern Ecuador” at <https://doi.org/10.1007/s11629-020-6479-3>

**Appendix 1** Species list and density of stems in the three elevational zones (low 2437–2700 m, middle 2756–3052 m and high 3163–3334 m). Data of 1144 stems found in SVR by elevation and endemic species.

| Families/ Genera/ Species                      | No. of stems by elevation |        |      | Total | Endemic = E<br>None = N |
|------------------------------------------------|---------------------------|--------|------|-------|-------------------------|
|                                                | Low                       | Middle | High |       |                         |
| <b>Actinidiaceae</b>                           | 2                         | 3      |      | 5     | N                       |
| <i>Saurauia</i>                                | 2                         | 3      |      | 5     | N                       |
| <i>Saurauia brachybotrys</i> Turcz.            |                           | 1      |      | 1     | N                       |
| <i>Saurauia tomentosa</i> (Kunth) Spreng.      | 2                         | 2      |      | 4     | N                       |
| <b>Aquifoliaceae</b>                           |                           | 2      | 24   | 26    | N                       |
| <i>Ilex</i>                                    |                           | 2      | 24   | 26    | N                       |
| <i>Ilex hualgayoca</i> Loizeau & Spichiger     |                           | 2      | 20   | 22    | N                       |
| <i>Ilex myricoides</i> Kunth                   |                           |        | 3    | 3     | N                       |
| <i>Ilex weberlingii</i> Loizeau & Spichiger    |                           |        | 1    | 1     | N                       |
| <b>Araliaceae</b>                              | 12                        | 5      | 1    | 18    | N                       |
| <i>Oreopanax</i>                               | 12                        | 5      | 1    | 18    | N                       |
| <i>Oreopanax grandifolius</i> Borchs.          | 1                         | 3      | 1    | 5     | E                       |
| <i>Oreopanax palamophyllum</i> Harms           | 10                        | 2      |      | 12    | N                       |
| <i>Oreopanax robustus</i> Borchs.              | 1                         |        |      | 1     | E                       |
| <b>Asteraceae</b>                              | 12                        | 4      |      | 16    | N                       |
| Asteraceae                                     | 12                        | 4      |      | 16    | N                       |
| Asteraceae sp.                                 | 12                        | 4      |      | 16    | N                       |
| <b>Brunelliaceae</b>                           | 1                         | 2      | 1    | 4     | N                       |
| <i>Brunellia</i>                               | 1                         | 2      | 1    | 4     | N                       |
| <i>Brunellia acostae</i> Cuatrec.              | 1                         |        |      | 1     | N                       |
| <i>Brunellia tomentosa</i> Bonpl.              |                           | 2      | 1    | 3     | N                       |
| <b>Caprifoliaceae</b>                          |                           | 4      | 3    | 7     | N                       |
| <i>Viburnum</i>                                |                           | 4      | 3    | 7     | N                       |
| <i>Viburnum urbani</i> Graebn.                 |                           | 4      | 3    | 7     | N                       |
| <b>Celastraceae</b>                            |                           | 3      |      | 3     | N                       |
| <i>Maytenus</i>                                |                           | 3      |      | 3     | N                       |
| <i>Maytenus macrocarpa</i> (Ruiz & Pav.) Briq. |                           | 3      |      | 3     | N                       |
| <b>Chloranthaceae</b>                          | 6                         | 13     |      | 19    | N                       |
| <i>Hedyosmum</i>                               | 6                         | 13     |      | 19    | N                       |
| <i>Hedyosmum cuatrecazanum</i> Occhioni        | 6                         | 13     |      | 19    | N                       |
| <b>Clethraceae</b>                             | 4                         | 5      | 6    | 15    | N                       |
| <i>Clethra</i>                                 | 4                         | 5      | 6    | 15    | N                       |
| <i>Clethra fagifolia</i> Kunth                 | 2                         |        |      | 2     | N                       |
| <i>Clethra ovalifolia</i> Turcz.               |                           |        | 6    | 6     | N                       |
| <i>Clethra revolute</i> (Ruiz & Pav.) Spreng.  | 2                         | 5      |      | 7     | N                       |
| <b>Clusiaceae</b>                              | 36                        | 14     |      | 50    | N                       |
| <i>Clusia</i>                                  | 36                        | 14     |      | 50    | N                       |
| <i>Clusia</i> sp.1                             |                           | 11     |      | 11    | N                       |
| <i>Clusia</i> sp.2                             | 3                         |        |      | 3     | N                       |
| <i>Clusia</i> sp.3                             | 1                         | 3      |      | 4     | N                       |
| <i>Clusia</i> sp.4                             | 1                         |        |      | 1     | N                       |
| <i>Clusia</i> sp.5                             | 31                        |        |      | 31    | N                       |
| <b>Cunoniaceae</b>                             | 3                         | 21     | 97   | 121   | N                       |
| <i>Weinmannia</i>                              | 3                         | 21     | 97   | 121   | N                       |
| <i>Weinmannia auriculifera</i> Hieron.         |                           | 1      | 10   | 11    | N                       |
| <i>Weinmannia lentiscifolia</i> C. Presl       | 3                         | 18     | 3    | 24    | N                       |
| <i>Weinmannia mariquitae</i> Szyszyl.          |                           |        | 3    | 3     | N                       |
| <i>Weinmannia pinnata</i> L.                   |                           |        | 8    | 8     | N                       |
| <i>Weinmannia rollottii</i> Killip             |                           | 2      | 73   | 75    | N                       |
| <b>Cyatheaceae</b>                             | 31                        | 40     | 21   | 92    | N                       |

(-To be continued-)

(-Continued-) **Appendix 1** Species list and density of stems in the three elevational zones (low 2437–2700 m, middle 2756–3052 m and high 3163–3334 m). Data of 1144 stems found in SVR by elevation and endemic species.

| Families/ Genera/ Species                                  | No. of stems by elevation |        |      | Total | Endemic = E<br>None = N |
|------------------------------------------------------------|---------------------------|--------|------|-------|-------------------------|
|                                                            | Low                       | Middle | High |       |                         |
| <i>Cyathea</i>                                             | 31                        | 40     | 21   | 92    | N                       |
| <i>Cyathea</i> cf. <i>Frigida</i> (H. Karst.) Domin        | 25                        | 38     | 21   | 84    | N                       |
| <i>Cyathea fulva</i> (M. Martens & Galeotti) Fée           | 6                         | 2      |      | 8     | N                       |
| <b>Dicksoniaceae</b>                                       | 3                         | 8      |      | 11    | N                       |
| <i>Dicksonia</i>                                           | 3                         | 8      |      | 11    | N                       |
| <i>Dicksonia sellowiana</i> Hook.                          | 3                         | 8      |      | 11    | N                       |
| <b>Ericaceae</b>                                           |                           |        | 1    | 1     | N                       |
| <i>Pernettya</i>                                           |                           |        | 1    | 1     | N                       |
| <i>Pernettya prostrata</i> (Cav.) DC.                      |                           |        | 1    | 1     | N                       |
| <b>Escalloniaceae</b>                                      |                           |        | 5    | 5     | N                       |
| <i>Escallonia</i>                                          |                           |        | 5    | 5     | N                       |
| <i>Escallonia myrtilloides</i> L. f.                       |                           |        | 5    | 5     | N                       |
| <b>Euphorbiaceae</b>                                       | 18                        | 6      |      | 24    | N                       |
| <i>Hyeronima</i>                                           | 3                         | 2      |      | 5     | N                       |
| <i>Hyeronima macrocarpa</i> Müll. Arg.                     | 1                         |        |      | 1     | N                       |
| <i>Hyeronima scabrida</i> (Tul.) Müll. Arg.                | 2                         | 2      |      | 4     | N                       |
| <i>Sapium</i>                                              | 15                        |        |      | 15    | N                       |
| <i>Sapium laurifolium</i> (A. Rich.) Griseb.               | 10                        |        |      | 10    | N                       |
| <i>Sapium stylare</i> Müll. Arg.                           | 5                         |        |      | 5     | N                       |
| <i>Tetrorchidium</i>                                       |                           | 4      |      | 4     | N                       |
| <i>Tetrorchidium macrophyllum</i> Müll. Arg.               |                           | 4      |      | 4     | N                       |
| <b>Fabaceae</b>                                            | 6                         |        |      | 6     | N                       |
| <i>Dussia</i>                                              | 3                         |        |      | 3     | N                       |
| <i>Dussia lehmannii</i> Harms                              | 3                         |        |      | 3     | N                       |
| <i>Erythrina</i>                                           | 3                         |        |      | 3     | N                       |
| <i>Erythrina edulis</i> Triana ex Micheli                  | 2                         |        |      | 2     | N                       |
| <i>Erythrina schimpffii</i> Diels                          | 1                         |        |      | 1     | E                       |
| <b>Flacourtiaceae</b>                                      | 23                        | 2      |      | 25    | N                       |
| <i>Banara</i>                                              |                           | 2      |      | 2     | N                       |
| <i>Banara guianensis</i> Aubl.                             |                           | 2      |      | 2     | N                       |
| <i>Casearia</i>                                            | 23                        |        |      | 23    | N                       |
| <i>Casearia sylvestris</i> Sw.                             | 23                        |        |      | 23    | N                       |
| <b>Lauraceae</b>                                           | 35                        | 13     |      | 48    | N                       |
| <i>Beilschmiedia</i>                                       | 3                         | 1      |      | 4     | N                       |
| <i>Beilschmiedia tovarensis</i>                            | 3                         | 1      |      | 4     | E                       |
| <i>Endlicheria</i>                                         | 1                         | 1      |      | 2     | N                       |
| <i>Endlicheria</i> sp.1                                    | 1                         |        |      | 1     | N                       |
| <i>Endlicheria</i> sp.4                                    |                           | 1      |      | 1     | N                       |
| Lauraceae                                                  | 2                         |        |      | 2     | N                       |
| Lauraceae sp.2                                             | 1                         |        |      | 1     | N                       |
| Lauraceae sp.3                                             | 1                         |        |      | 1     | N                       |
| <i>Nectandra</i>                                           | 17                        | 9      |      | 26    | N                       |
| <i>Nectandra</i> cf. <i>laurel</i> Klotzsch ex Nees        | 3                         | 3      |      | 6     | N                       |
| <i>Nectandra</i> cf. <i>lineatifolia</i> (Ruiz & Pav.) Mez | 3                         | 3      |      | 6     | N                       |
| <i>Nectandra</i> cf. <i>obtusata</i> Rohwer                | 6                         | 1      |      | 7     | N                       |
| <i>Nectandra</i> sp.1                                      | 5                         | 2      |      | 7     | N                       |
| <i>Ocotea</i>                                              | 12                        | 2      |      | 14    | N                       |
| <i>Ocotea pachypoda</i> Mez & Sodiro                       | 4                         | 1      |      | 5     | E                       |
| <i>Ocotea sericea</i> Kunth                                | 8                         | 1      |      | 9     | N                       |
| <b>Melastomataceae</b>                                     | 53                        | 115    | 11   | 179   | N                       |
| <i>Axinaea</i>                                             |                           | 8      | 5    | 13    | N                       |
| <i>Axinaea</i> cf. <i>sclerophylla</i> Triana              |                           | 7      |      | 7     | E                       |
| <i>Axinaea macrophylla</i> (Naudin) Triana                 |                           |        | 5    | 5     | N                       |
| <i>Axinaea quitensis</i> Benoist                           |                           | 1      |      | 1     | E                       |

(-To be continued-)

(-Continued-) **Appendix 1** Species list and density of stems in the three elevational zones (low 2437–2700 m, middle 2756–3052 m and high 3163–3334 m). Data of 1144 stems found in SVR by elevation and endemic species.

| Families/ Genera/ Species                               | No. of stems by elevation |        |      | Total | Endemic = E<br>None = N |
|---------------------------------------------------------|---------------------------|--------|------|-------|-------------------------|
|                                                         | Low                       | Middle | High |       |                         |
| <i>Blakea</i>                                           | 4                         |        |      | 4     | N                       |
| <i>Blakea rotundifolia</i> D. Don                       | 4                         |        |      | 4     | E                       |
| <i>Meriania</i>                                         | 3                         | 1      |      | 4     | N                       |
| <i>Meriania maxima</i> Markgr.                          |                           | 1      |      | 1     | N                       |
| <i>Meriania tomentosa</i> (Cogn.) Wurdack               | 3                         |        |      | 3     | N                       |
| <i>Miconia</i>                                          | 12                        | 48     | 6    | 66    | N                       |
| <i>Miconia barbeyana</i> Cogn.                          |                           | 1      |      | 1     | N                       |
| <i>Miconia</i> cf. <i>sodiroi</i> Wurdack               |                           | 11     | 3    | 14    | E                       |
| <i>Miconia corymbiformis</i> Cogn.                      |                           | 7      | 1    | 8     | N                       |
| <i>Miconia difficilis</i> Triana                        |                           | 2      |      | 2     | N                       |
| <i>Miconia lasiocalyx</i> Cogn.                         | 10                        | 10     |      | 20    | N                       |
| <i>Miconia</i> sp. 1                                    |                           |        | 2    | 2     | N                       |
| <i>Miconia theaezans</i> (Bonpl.) Cogn.                 | 2                         | 17     |      | 19    | N                       |
| <i>Tibouchina</i>                                       |                           | 1      |      | 1     | N                       |
| <i>Tibouchina gleasoniana</i> Wurdack                   |                           | 1      |      | 1     | E                       |
| <i>Topobea</i>                                          | 34                        | 57     |      | 91    | N                       |
| <i>Topobea</i> cf. <i>acuminate</i> Wurdack             | 34                        | 57     |      | 91    | N                       |
| <b>Meliaceae</b>                                        | 12                        | 8      | 1    | 21    | N                       |
| <i>Guarea</i>                                           | 10                        | 2      |      | 12    | N                       |
| <i>Guarea kunthiana</i> A. Juss.                        | 10                        | 2      |      | 12    | N                       |
| <i>Ruagea</i>                                           | 2                         | 6      | 1    | 9     | N                       |
| <i>Ruagea membranacea</i> W. Palacios                   | 1                         |        |      | 1     | E                       |
| <i>Ruagea pubescens</i> H. Karst.                       |                           | 6      | 1    | 7     | N                       |
| <i>Ruagea tomentosa</i> Cuatrec.                        | 1                         |        |      | 1     | N                       |
| <b>Mimosaceae</b>                                       | 11                        |        |      | 11    | N                       |
| <i>Inga</i>                                             | 11                        |        |      | 11    | N                       |
| <i>Inga</i> cf. <i>insignis</i> Kunth                   | 11                        |        |      | 11    | N                       |
| <b>Moraceae</b>                                         | 11                        | 1      |      | 12    | N                       |
| <i>Ficus</i>                                            | 10                        | 1      |      | 11    | N                       |
| <i>Ficus dulciaria</i> Dugand                           | 10                        | 1      |      | 11    | N                       |
| <i>Morus</i>                                            | 1                         |        |      | 1     | N                       |
| <i>Morus insignis</i> Bureau                            | 1                         |        |      | 1     | N                       |
| <b>Myrsinaceae</b>                                      | 13                        | 7      | 21   | 41    | N                       |
| <i>Cybianthus</i>                                       |                           |        | 1    | 1     | N                       |
| <i>Cybianthus</i> sp.                                   |                           |        | 1    | 1     | N                       |
| <i>Geissanthus</i>                                      | 9                         | 7      | 20   | 36    | N                       |
| <i>Geissanthus andinus</i> Mez                          |                           |        | 15   | 15    | N                       |
| <i>Geissanthus ecuadorensis</i> Mez                     | 9                         | 7      | 2    | 18    | E                       |
| <i>Geissanthus vanderwerffii</i> Pipoly                 |                           |        | 3    | 3     | E                       |
| <i>Myrsine</i>                                          | 4                         |        |      | 4     | N                       |
| <i>Myrsine andina</i> (Mez) Pipoly                      | 3                         |        |      | 3     | N                       |
| <i>Myrsine coriacea</i> (Sw.) R. Br. ex Roem. & Schult. | 1                         |        |      | 1     | N                       |
| <b>Myrtaceae</b>                                        | 58                        | 11     |      | 69    | N                       |
| <i>Myrcianthes</i>                                      | 58                        | 11     |      | 69    | N                       |
| <i>Myrcianthes orthostemon</i> (O. Berg) Grifo          | 3                         | 4      |      | 7     | N                       |
| <i>Myrcianthes rhopaloides</i> (Kunth) McVaugh          | 55                        | 6      |      | 61    | N                       |
| <i>Myrcianthes</i> sp.1                                 |                           | 1      |      | 1     | N                       |
| <b>Piperaceae</b>                                       | 15                        | 1      |      | 16    | N                       |
| <i>Piper</i>                                            | 15                        | 1      |      | 16    | N                       |
| <i>Piper puraceanum</i> Trel. & Yunck.                  |                           | 1      |      | 1     | N                       |
| <i>Piper sodiroi</i> C. DC.                             | 15                        |        |      | 15    | E                       |
| <b>Primulaceae</b>                                      |                           | 3      |      | 7     | N                       |
| <i>Ardisia</i>                                          |                           | 3      |      | 3     | N                       |
| <i>Ardisia foetida</i> Willd. ex Roem. & Schult.        |                           | 3      |      | 3     | N                       |

(-To be continued-)

(-Continued-) **Appendix 1** Species list and density of stems in the three elevational zones (low 2437–2700 m, middle 2756–3052 m and high 3163–3334 m). Data of 1144 stems found in SVR by elevation and endemic species.

| Families/ Genera/ Species                                            | No. of stems by elevation |        |      | Total | Endemic = E<br>None = N |
|----------------------------------------------------------------------|---------------------------|--------|------|-------|-------------------------|
|                                                                      | Low                       | Middle | High |       |                         |
| <b>Rosaceae</b>                                                      | 7                         | 3      | 9    | 19    | N                       |
| <i>Hesperomeles</i>                                                  |                           |        | 2    | 2     | N                       |
| <i>Hesperomeles obtusifolia</i> (Pers.) Lindl.                       |                           |        | 2    | 2     | N                       |
| <i>Prunus</i>                                                        | 7                         | 3      | 7    | 17    | N                       |
| <i>Prunus huantensis</i> Pilg.                                       | 7                         | 3      | 7    | 17    | N                       |
| <b>Rubiaceae</b>                                                     | 71                        | 38     | 5    | 114   | N                       |
| <i>Cinchona</i>                                                      | 3                         | 1      | 2    | 6     | N                       |
| <i>Cinchona pitayensis</i> (Wedd.) Wedd.                             | 2                         | 1      | 2    | 5     | N                       |
| <i>Cinchona pubescens</i> Vahl                                       | 1                         |        |      | 1     | N                       |
| <i>Faramea</i>                                                       | 41                        | 27     |      | 68    | N                       |
| <i>Faramea calyprate</i> C.M. Taylor                                 | 40                        |        |      | 40    | N                       |
| <i>Faramea</i> cf. <i>ovalis</i> Standl.                             |                           | 13     |      | 13    | N                       |
| <i>Faramea flavicans</i> (Humb. & Bonpl. ex Roem. & Schult.) Standl. | 1                         | 14     |      | 15    | N                       |
| <i>Gonzalagunia</i>                                                  |                           | 1      |      | 1     | N                       |
| <i>Gonzalagunia</i> sp.                                              |                           | 1      |      | 1     | N                       |
| <i>Guettarda</i>                                                     | 5                         | 2      |      | 7     | N                       |
| <i>Guettarda crispiflora</i>                                         | 1                         |        |      | 1     | N                       |
| <i>Guettarda hirsute</i> (Ruiz & Pav.) Pers.                         | 4                         | 2      |      | 6     | N                       |
| <i>Palicourea</i>                                                    | 22                        | 7      | 3    | 32    | N                       |
| <i>Palicourea amethystine</i> (Ruiz & Pav.) DC.                      | 7                         | 2      | 3    | 12    | N                       |
| <i>Palicourea</i> cf. <i>stipularis</i> Benth.                       | 6                         | 1      |      | 7     | N                       |
| <i>Palicourea cornigera</i> C.M. Taylor                              |                           | 4      |      | 4     | E                       |
| <i>Palicourea lineata</i> Benth.                                     | 2                         |        |      | 2     | N                       |
| <i>Palicourea lyrastipula</i> Wernham                                | 5                         |        |      | 5     | N                       |
| <i>Palicourea stenosepala</i> Standl.                                | 2                         |        |      | 2     | E                       |
| <b>Rutaceae</b>                                                      |                           | 1      |      | 1     | N                       |
| <i>Zanthoxylum</i>                                                   |                           | 1      |      | 1     | N                       |
| <i>Zanthoxylum andinum</i> Reynel                                    |                           | 1      |      | 1     | N                       |
| <b>Sabiaceae</b>                                                     | 12                        | 9      | 2    | 23    | N                       |
| <i>Meliosma</i>                                                      | 12                        | 9      | 2    | 23    | N                       |
| <i>Meliosma arenosa</i> Idrobo & Cuatrec.                            | 1                         | 4      |      | 5     | N                       |
| <i>Meliosma frondosa</i> Cuatrec. & Idrobo                           | 9                         | 5      | 2    | 16    | N                       |
| <i>Meliosma</i> sp.1                                                 | 2                         |        |      | 2     | N                       |
| <b>Sapindaceae</b>                                                   |                           | 5      |      | 5     | N                       |
| <i>Allophylus</i>                                                    |                           | 5      |      | 5     | N                       |
| <i>Allophylus excelsus</i> (Triana & Planch.) Radlk.                 |                           | 1      |      | 1     | N                       |
| <i>Allophylus floribundus</i> (Poepp.) Radlk.                        |                           | 4      |      | 4     | N                       |
| <b>Siparunaceae</b>                                                  |                           | 1      | 1    | 2     | N                       |
| <i>Siparuna</i>                                                      |                           | 1      | 1    | 2     | N                       |
| <i>Siparuna pilosolepidota</i> Heilborn                              |                           | 1      | 1    | 2     | E                       |
| <b>Solanaceae</b>                                                    | 8                         | 4      | 1    | 13    | N                       |
| <i>Cestrum</i>                                                       |                           |        | 1    | 1     | N                       |
| <i>Cestrum humboldtii</i> Francey                                    |                           |        | 1    | 1     | N                       |
| Solanaceae                                                           | 6                         | 3      |      | 9     | N                       |
| <i>Solanaceae</i> sp.2                                               | 6                         | 1      |      | 7     | N                       |
| <i>Solanaceae</i> sp.3                                               |                           | 2      |      | 2     | N                       |
| <i>Solanum</i>                                                       | 2                         | 1      |      | 3     | N                       |
| <i>Solanum</i> sp.1                                                  | 2                         |        |      | 2     | N                       |
| <i>Solanum</i> sp.2                                                  |                           | 1      |      | 1     | N                       |
| <b>Staphyleaceae</b>                                                 | 2                         | 3      |      | 5     | N                       |
| <i>Turpinia</i>                                                      | 2                         | 3      |      | 5     | N                       |
| <i>Turpinia heterophylla</i> (Ruiz & Pav.) Tul.                      | 1                         | 3      |      | 4     | N                       |
| <i>Turpinia occidentalis</i> (Sw.) G. Don                            | 1                         |        |      | 1     | N                       |

(-To be continued-)

(-Continued-) **Appendix 1** Species list and density of stems in the three elevational zones (low 2437–2700 m, middle 2756–3052 m and high 3163–3334 m). Data of 1144 stems found in SVR by elevation and endemic species.

| Families/ Genera/ Species                               | No. of stems by elevation |        |      | Total | Endemic = E<br>None = N |
|---------------------------------------------------------|---------------------------|--------|------|-------|-------------------------|
|                                                         | Low                       | Middle | High |       |                         |
| <b>Styracaceae</b>                                      | 1                         | 4      |      | 5     | N                       |
| <i>Styrax</i>                                           | 1                         | 4      |      | 5     | N                       |
| <i>Styrax heterotrichus</i> Perkins                     | 1                         | 4      |      | 5     | N                       |
| <b>Symplocaceae</b>                                     | 3                         | 4      | 2    | 9     | N                       |
| <i>Symplocos</i>                                        | 3                         | 4      | 2    | 9     | N                       |
| <i>Symplocos quitensis</i> Brand                        | 3                         | 1      |      | 4     | N                       |
| <i>Symplocos subandina</i> B. Ståhl                     |                           | 3      | 2    | 5     | E                       |
| <b>Theaceae</b>                                         | 6                         | 43     | 40   | 89    | N                       |
| <i>Freziera</i>                                         |                           | 2      | 29   | 31    | N                       |
| <i>Freziera reticulata</i> Bonpl.                       |                           | 2      | 1    | 3     | N                       |
| <i>Freziera verrucosa</i> Kobuski                       |                           |        | 28   | 28    | N                       |
| <i>Gordonia</i>                                         | 3                         | 27     | 11   | 41    | N                       |
| <i>Gordonia fruticosa</i> (Schrad.) H. Keng             | 3                         | 27     | 11   | 41    | N                       |
| <i>Ternstroemia</i>                                     | 3                         | 14     |      | 17    | N                       |
| <i>Ternstroemia lehmannii</i> (Hieron.) Urb.            | 3                         | 14     |      | 17    | N                       |
| <b>Thymelaeaceae</b>                                    | 1                         |        |      | 1     | N                       |
| <i>Schoenobiblus</i>                                    | 1                         |        |      | 1     | N                       |
| <i>Schoenobiblus panamensis</i> Standl. & L.O. Williams | 1                         |        |      | 1     | N                       |
| <b>Urticaceae</b>                                       |                           | 1      |      | 1     | N                       |
| <i>Boehmeria</i>                                        |                           | 1      |      | 1     | N                       |
| <i>Boehmeria celtidifolia</i> Kunth                     |                           | 1      |      | 1     | N                       |
| <i>Cecropia</i>                                         | 4                         |        |      | 4     | N                       |
| <i>Cecropia gabrielis</i> Cuatrec.                      | 1                         |        |      | 1     | N                       |
| <i>Cecropia maxima</i> Snethl.                          | 3                         |        |      | 3     | E                       |
| <b>Verbenaceae</b>                                      | 1                         | 4      |      | 5     | N                       |
| <i>Aegiphila</i>                                        | 1                         | 4      |      | 5     | N                       |
| <i>Aegiphila bogotensis</i> (Spreng.) Moldenke          | 1                         | 2      |      | 3     | N                       |
| <i>Aegiphila</i> cf. <i>panamensis</i> Moldenke         |                           | 2      |      | 2     | N                       |
| <b>Total</b>                                            | 481                       | 411    | 252  | 1144  | 19                      |

**Appendix 2** Stand physical structure for 31 plots established in two transects (a) open trail (OT) transect and (b) closed trail (CT) transect.

(a) Open trail (OT)

| Plot | Plot elev. (m) | No. of stems | Height (m) |        |       | Diameter at breast height (cm) |      |        | Basal Area (m <sup>2</sup> ha <sup>-1</sup> ) | Stand volume (m <sup>2</sup> ha <sup>-1</sup> ) |
|------|----------------|--------------|------------|--------|-------|--------------------------------|------|--------|-----------------------------------------------|-------------------------------------------------|
|      |                |              | Max.       | Median | Mean  | Max.                           | Mean | Median |                                               |                                                 |
| 15   | 2437           | 53           | 24         | 8      | 9.44  | 57                             | 14.7 | 9.8    | 61.78                                         | 10307                                           |
| 14   | 2561           | 42           | 22         | 10     | 10.33 | 61.5                           | 16.8 | 11.8   | 65.20                                         | 9432.3                                          |
| 13   | 2669           | 33           | 32         | 10     | 12.22 | 64.5                           | 18.9 | 12.6   | 61.58                                         | 8282.5                                          |
| 12   | 2700           | 29           | 20         | 10     | 10.95 | 56.5                           | 16.8 | 12.8   | 39.85                                         | 4217.5                                          |
| 11   | 2773           | 39           | 20         | 10     | 10.85 | 44.5                           | 16.3 | 14     | 46.30                                         | 6528.3                                          |
| 10   | 2820           | 44           | 20         | 10     | 9.75  | 30.7                           | 13.9 | 12.7   | 32.64                                         | 4667.5                                          |
| 31   | 2824           | 58           | 24         | 11.5   | 13.20 | 42.5                           | 14.4 | 9.8    | 53.53                                         | 13668                                           |
| 9    | 2860           | 23           | 30         | 9      | 11.99 | 68.5                           | 20.8 | 14.5   | 49.00                                         | 4504.7                                          |
| 8    | 2946           | 24           | 16         | 10     | 10.00 | 36                             | 19.6 | 17.8   | 33.82                                         | 2705.6                                          |
| 7    | 3022           | 35           | 25         | 9      | 10.44 | 48                             | 18   | 12     | 52.12                                         | 6350                                            |
| 6    | 3093           | 21           | 35         | 11.5   | 12.75 | 59                             | 20.5 | 15     | 44.07                                         | 3931                                            |
| 5    | 3163           | 21           | 16         | 7      | 8.29  | 52                             | 17.8 | 13.5   | 29.65                                         | 1719.7                                          |
| 4    | 3250           | 17           | 16         | 14     | 13.75 | 41.5                           | 21.6 | 18     | 28.67                                         | 2231.5                                          |
| 3    | 3288           | 63           | 24         | 12     | 11.68 | 36                             | 13.6 | 12.5   | 44.17                                         | 10836.4                                         |
| 1    | 3321           | 100          | 20         | 12     | 11.96 | 26                             | 10.7 | 11     | 40.16                                         | 16003.8                                         |
| 2    | 3334           | 51           | 11         | 7      | 6.72  | 20                             | 9    | 8      | 15.21                                         | 1736.5                                          |

(b) Closed trail (CT)

| Plot | Plot elev. (m) | No. of Stems | Height (m) |        |      | Diameter at breast height (cm) |      |        | Basal Area (m <sup>2</sup> ha <sup>-1</sup> ) | Stand Volume (m <sup>2</sup> ha <sup>-1</sup> ) |
|------|----------------|--------------|------------|--------|------|--------------------------------|------|--------|-----------------------------------------------|-------------------------------------------------|
|      |                |              | Max.       | Median | Mean | Max.                           | Mean | Median |                                               |                                                 |
| 28   | 2451           | 31           | 20         | 20     | 10.8 | 65                             | 21   | 14     | 68.22                                         | 7663.4                                          |
| 29   | 2474           | 22           | 20         | 11.5   | 12   | 61                             | 23.9 | 15.5   | 57.04                                         | 5057.5                                          |
| 30   | 2514           | 35           | 20         | 10     | 10.6 | 65                             | 16.7 | 10     | 50.68                                         | 6267.4                                          |
| 27   | 2572           | 48           | 20         | 12     | 11.6 | 39                             | 16   | 13     | 52.92                                         | 9843.1                                          |
| 26   | 2582           | 13           | 20         | 14     | 12.6 | 46                             | 24.5 | 22     | 31.33                                         | 1712.7                                          |
| 25   | 2603           | 34           | 20         | 9      | 10.2 | 61                             | 15.9 | 11     | 43.23                                         | 5029.1                                          |
| 24   | 2630           | 40           | 25         | 11.5   | 12.3 | 57                             | 15.2 | 11.5   | 44.67                                         | 7325.9                                          |
| 23   | 2631           | 32           | 16         | 9.5    | 9.8  | 26                             | 10.9 | 10     | 14.18                                         | 1488.9                                          |
| 22   | 2664           | 32           | 22         | 11.5   | 11.7 | 78                             | 18.4 | 10.3   | 71.49                                         | 8960.1                                          |
| 21   | 2680           | 37           | 20         | 10     | 10.5 | 49                             | 14   | 10     | 32.87                                         | 4256.7                                          |
| 20   | 2756           | 48           | 24         | 11     | 12.1 | 80                             | 16.8 | 12     | 69.85                                         | 13620.8                                         |
| 19   | 2830           | 20           | 22         | 14     | 14.1 | 92                             | 31.9 | 28     | 104.85                                        | 9873.4                                          |
| 18   | 2951           | 42           | 20         | 11.5   | 11.2 | 40                             | 14.9 | 10.8   | 40.97                                         | 6439.1                                          |
| 17   | 2989           | 31           | 23         | 10     | 10.5 | 69                             | 19.5 | 12.5   | 76.8                                          | 9728                                            |
| 16   | 3052           | 26           | 22         | 12     | 12.8 | 79                             | 23.9 | 15     | 93.29                                         | 10728.4                                         |

**Appendix 3** Stand density and species diversity in 31 plots established in two transects (a) open trail (OT) transect and (b) closed trail (CT) transect.

(a) Open trail (OT)

| Plot | Plot elev. (m) | No. of stems | No. of species | Shannon's diversity (species) | No. of families | Shannon's diversity (families) | Mean species per family | Mean individuals per species |
|------|----------------|--------------|----------------|-------------------------------|-----------------|--------------------------------|-------------------------|------------------------------|
| 15   | 2437           | 53           | 17             | 11.74                         | 13              | 9.48                           | 1.89                    | 3.31                         |
| 14   | 2561           | 42           | 14             | 8.43                          | 10              | 6.10                           | 1.56                    | 2.63                         |
| 13   | 2669           | 33           | 17             | 12.17                         | 12              | 9.13                           | 1.89                    | 2.06                         |
| 12   | 2700           | 29           | 18             | 15.30                         | 14              | 10.63                          | 2.00                    | 1.81                         |
| 11   | 2773           | 39           | 14             | 10.00                         | 11              | 6.99                           | 1.56                    | 2.44                         |
| 10   | 2820           | 44           | 23             | 18.95                         | 16              | 12.64                          | 2.56                    | 2.75                         |
| 31   | 2824           | 58           | 24             | 17.70                         | 16              | 9.50                           | 2.67                    | 3.63                         |
| 9    | 2860           | 23           | 14             | 11.72                         | 12              | 9.81                           | 1.56                    | 1.44                         |
| 8    | 2946           | 24           | 15             | 13.18                         | 10              | 7.34                           | 1.67                    | 1.50                         |
| 7    | 3022           | 35           | 15             | 11.20                         | 10              | 6.22                           | 1.67                    | 2.19                         |
| 6    | 3093           | 21           | 10             | 7.52                          | 9               | 7.04                           | 1.11                    | 1.31                         |
| 5    | 3163           | 21           | 11             | 10.07                         | 10              | 9.20                           | 1.22                    | 1.31                         |
| 4    | 3250           | 17           | 8              | 6.83                          | 8               | 6.83                           | 0.89                    | 1.06                         |
| 3    | 3288           | 63           | 14             | 9.10                          | 9               | 5.81                           | 1.56                    | 3.94                         |
| 1    | 3321           | 100          | 16             | 8.31                          | 9               | 4.55                           | 1.78                    | 6.25                         |
| 2    | 3334           | 51           | 11             | 6.08                          | 8               | 5.11                           | 1.22                    | 3.19                         |

(b) Closed trail (CT)

| Plot | Plot Ele. (m) | No. of stems | No. of species | Shannon's diversity (species) | No. of families | Shannon's diversity (families) | Mean species per family | Mean individuals per species |
|------|---------------|--------------|----------------|-------------------------------|-----------------|--------------------------------|-------------------------|------------------------------|
| 28   | 2451          | 31           | 17             | 14.82                         | 14              | 11.82                          | 1.89                    | 1.94                         |
| 29   | 2474          | 22           | 11             | 8.48                          | 10              | 7.96                           | 1.22                    | 1.38                         |
| 30   | 2514          | 35           | 17             | 14.35                         | 11              | 8.58                           | 1.89                    | 2.19                         |
| 27   | 2572          | 48           | 18             | 14.50                         | 15              | 11.23                          | 2.00                    | 3.00                         |
| 26   | 2582          | 13           | 8              | 7.32                          | 8               | 7.33                           | 0.89                    | 0.81                         |
| 25   | 2603          | 34           | 17             | 13.69                         | 13              | 11.27                          | 1.89                    | 2.13                         |
| 24   | 2630          | 40           | 20             | 13.84                         | 13              | 9.53                           | 2.22                    | 2.50                         |
| 23   | 2631          | 32           | 17             | 14.09                         | 13              | 10.32                          | 1.89                    | 2.00                         |
| 22   | 2664          | 32           | 20             | 15.07                         | 16              | 12.27                          | 2.22                    | 2.00                         |
| 21   | 2680          | 37           | 24             | 19.16                         | 19              | 14.40                          | 2.67                    | 2.31                         |
| 20   | 2756          | 48           | 23             | 17.47                         | 15              | 10.04                          | 2.56                    | 3.00                         |
| 19   | 2830          | 20           | 15             | 13.42                         | 10              | 8.37                           | 1.67                    | 1.25                         |
| 18   | 2951          | 42           | 21             | 15.02                         | 16              | 11.68                          | 2.33                    | 2.63                         |
| 17   | 2989          | 31           | 17             | 11.78                         | 16              | 10.61                          | 1.89                    | 1.94                         |
| 16   | 3052          | 26           | 16             | 13.71                         | 12              | 8.37                           | 1.78                    | 1.63                         |

**Appendix 4** Data of number of species and sample area in the ecological literature and our study area. Arrows indicate the trend reported in each study and N/A data not available.

| Transect                             | Elevational range  | Sample area        | Sampled plots | No. of species | Diameter at breast height | Alpha diversity | Reference                                     |
|--------------------------------------|--------------------|--------------------|---------------|----------------|---------------------------|-----------------|-----------------------------------------------|
| Siempre Verde Reserve                | 2437–3334 m        | 0.775 ha           | 31            | 130            | ≥ 5 cm                    | ↓               | Our study                                     |
| Pasocha volcano                      | 3310–3260 m        | 1 ha               | 1             | 31             | ≥ 5 cm                    | N/A             | <a href="#">Valencia and Jørgensen (1992)</a> |
| Cotacachi–Cayapas Ecological Reserve | 3330–3630 m        | 0.2 ha             | 4             | 28             | ≥2.5 cm                   | ↓               | <a href="#">Young and Keating (2001)</a>      |
|                                      | 3330 m             | 500 m <sup>2</sup> | 1             | 18             |                           |                 |                                               |
|                                      | 3430 m             | 500 m <sup>2</sup> | 1             | 20             |                           |                 |                                               |
|                                      | 3530 m             | 500 m <sup>2</sup> | 1             | 14             |                           |                 |                                               |
| 3630 m                               | 500 m <sup>2</sup> | 1                  | 13            |                |                           |                 |                                               |
| Reserva San Francisco                | 1850–2570 m        | 0.68 ha            | 17            | 190            | ≥ 5 cm                    | ↓               | <a href="#">Homeier et al. (2010)</a>         |

## References

- Valencia R, Jørgensen PM (1992) Composition and structure of a humid montane forest on the Pasocha volcano, Ecuador. *Nord J Bot* 12(2): 239-247. <https://doi.org/10.1111/j.1756-1051.1992.tb01301.x>
- Young KR, Keating PL (2001) Remnant forests of Volcan Cotacachi, northern Ecuador. *Arct Antarct Alp Res* 33(2): 165-172. <https://doi.org/10.1080/15230430.2001.12003419>
- Homeier J, Bomeiereckle S, Günter S, et al. (2010) Tree Diversity, Forest Structure and Productivity along Altitudinal and Topographical Gradients in a Species Rich Ecuadorian Montane Rain Forest. *Biotropica* 42(2): 140-148. <https://doi.org/10.1111/j.1744-7429.2009.00547.x>
